# Supplementary material
Source: Research Square preprint supplement (doi:10.21203/rs.3.rs-9928562/v1)
Supplement: Supplementary file 1 [file 501a789b660ca6f703216a19.pdf]

| Gene     | WT          | R6/2        | pValue  |
|----------|-------------|-------------|---------|
| ALKBH1   | 1 ± 0.08    | 1.27 ± 0.08 | 0.0027  |
| ALKBH2   | 1 ± 0.2     | 1.4 ± 0.16  | 0.0237  |
| ALKBH4   | 1 ± 0.63    | 2.73 ± 0.88 | 0.0213  |
| ALKBH5   | 1 ± 0.2     | 1.42 ± 0.19 | 0.0217  |
| ALKBH6   | 1 ± 0.08    | 1.05 ± 0.18 | 0.6349  |
| CBLL1    | 1 ± 0.11    | 0.9 ± 0.15  | 0.3267  |
| EIF3A    | 1 ± 0.07    | 1.18 ± 0.25 | 0.2382  |
| FMRP     | 1 ± 0.05    | 1.02 ± 0.22 | 0.8489  |
| FTO      | 1 ± 0.08    | 0.94 ± 0.11 | 0.4012  |
| HNRG     | 1 ± 0.05    | 1.27 ± 0.14 | 0.024   |
| HNRNPA   | 1 ± 0.06    | 1.18 ± 0.04 | 0.004   |
| HNRNPC   | 1 ± 0.11    | 1.27 ± 0.21 | 0.072   |
| IGF2BP1  | 1 ± 0.52    | 1.96 ± 0.79 | 0.0976  |
| IGF2BP2  | 1 ± 0.38    | 1.23 ± 0.2  | 0.3408  |
| IGF2BP3  | 1 ± 0.8     | 6.91 ± 1.29 | 0.0006  |
| KIAA1429 | 1 ± 0.16    | 1.48 ± 0.16 | 0.0051  |
| METTL1   | 1 ± 0.12    | 1.96 ± 0.46 | 0.021   |
| METTL14  | 1 ± 1       | 0.75 ± 0.36 | 0.6657  |
| METTL15  | 1 ± 0.05    | 1.42 ± 0.09 | 0.0007  |
| METTL16  | 1 ± 0.09    | 1.49 ± 0.24 | 0.0194  |
| METTL17  | 1 ± 0.19    | 0.96 ± 0.18 | 0.7415  |
| METTL19  | 1 ± 0.14    | 1.27 ± 0.1  | 0.0237  |
| METTL2   | 1 ± 0.1     | 1.61 ± 0.25 | 0.0101  |
| METTL25  | 1 ± 0.17    | 1.2 ± 0.12  | 0.1042  |
| METTL25B | 1 ± 0.11    | 1.77 ± 0.27 | 0.0063  |
| METTL26  | 1 ± 0.17    | 1.28 ± 0.11 | 0.0411  |
| METTL27  | 1 ± 0.19    | 1.15 ± 0.08 | 0.2102  |
| METTL3   | 1 ± 0.14    | 1.05 ± 0.19 | 0.6607  |
| METTL4   | 1 ± 0.22    | 1.26 ± 0.18 | 0.1136  |
| METTL5   | 1 ± 0.2     | 1.14 ± 0.22 | 0.3797  |
| METTL6   | 1 ± 0.16    | 0.81 ± 0.03 | 0.097   |
| METTL7A  | 1 ± 0.15    | 1.27 ± 0.15 | 0.0458  |
| METTL8   | 1 ± 0.19    | 1.05 ± 0.07 | 0.6415  |
| RBM15    | 1 ± 0.09    | 1.28 ± 0.13 | 0.0133  |
| VIRMA    | 1 ± 0.13    | 1.09 ± 0.08 | 0.2946  |
| WATP     | 1 ± 0.1     | 1.44 ± 0.23 | 0.0226  |
| YTHDC1   | 1.14 ± 0.21 | 2.09 ± 0.15 | 0.0005  |
| YTHDC2   | 1 ± 0.2     | 1.15 ± 0.14 | 0.2735  |
| YTHDF1   | 1 ± 0.13    | 1 ± 0.13    | >0.9999 |
| YTHDF2   | 1 ± 0.08    | 1.4 ± 0.16  | 0.008   |

|        |          |             |        |
|--------|----------|-------------|--------|
| YTHDF3 | 1 ± 0.13 | 1.4 ± 0.23  | 0.0305 |
| Z3CH   | 1 ± 0.2  | 1.13 ± 0.09 | 0.2973 |

**Supplementary Table 1.** Gene expression levels (mean ± SD) for Sec RNA modification regulatory genes, including writers, readers, and erasers, in WT and R6/2 Cortex. Statistical significance between wild-type (WT) and R6/2 groups was assessed using an unpaired *t*-test (N = 4 per group). Reported *p*-values indicate differences in expression between WT and R6/2

| Gene     | WT       | R6/2         | pValue |
|----------|----------|--------------|--------|
| ALKBH1   | 1 ± 0.15 | 1.15 ± 0.18  | 0.2436 |
| ALKBH2   | 1 ± 0.2  | 1.33 ± 0.19  | 0.054  |
| ALKBH4   | 1 ± 0.39 | 0.83 ± 0.42  | 0.5646 |
| ALKBH5   | 1 ± 0.14 | 1.16 ± 0.24  | 0.3084 |
| ALKBH6   | 1 ± 0.18 | 1.21 ± 0.16  | 0.1434 |
| CBLL1    | 1 ± 0.23 | 0.66 ± 0.09  | 0.0471 |
| EIF3A    | 1 ± 0.31 | 0.98 ± 0.17  | 0.9109 |
| FMRP     | 1 ± 0.22 | 0.66 ± 0.06  | 0.0475 |
| FTO      | 1 ± 0.28 | 0.77 ± 0.09  | 0.2013 |
| HNRG     | 1 ± 0.23 | 0.92 ± 0.22  | 0.6314 |
| HNRNPA   | 1 ± 0.08 | 0.75 ± 0.07  | 0.0037 |
| HNRNPC   | 1 ± 0.29 | 1.09 ± 0.25  | 0.6442 |
| IGF2BP1  | 1 ± 0.41 | 0.96 ± 0.33  | 0.8933 |
| IGF2BP2  | 1 ± 0.43 | 0.52 ± 0.09  | 0.1097 |
| IGF2BP3  | 1 ± 0.56 | 16.27 ± 2.95 | 0.0015 |
| KIAA1429 | 1 ± 0.13 | 0.75 ± 0.1   | 0.0245 |
| METTL1   | 1 ± 0.18 | 1.63 ± 0.23  | 0.0061 |
| METTL14  | 1 ± 0.65 | 0.46 ± 0.25  | 0.1967 |
| METTL15  | 1 ± 0.09 | 1.34 ± 0.08  | 0.0012 |
| METTL16  | 1 ± 0.29 | 1.35 ± 0.18  | 0.0963 |
| METTL17  | 1 ± 0.14 | 0.88 ± 0.16  | 0.3073 |
| METTL19  | 1 ± 0.15 | 1.11 ± 0.45  | 0.669  |
| METTL2   | 1 ± 0.08 | 1.52 ± 0.22  | 0.0131 |
| METTL25  | 1 ± 0.15 | 1.13 ± 0.14  | 0.2434 |
| METTL25B | 1 ± 0.2  | 1.52 ± 0.24  | 0.0173 |
| METTL26  | 1 ± 0.14 | 1.75 ± 0.28  | 0.0072 |
| METTL27  | 1 ± 0.19 | 1.21 ± 0.2   | 0.1741 |
| METTL3   | 1 ± 0.19 | 0.99 ± 0.09  | 0.9346 |
| METTL4   | 1 ± 0.19 | 1.01 ± 0.17  | 0.9266 |

|         |          |             |        |
|---------|----------|-------------|--------|
| METTL5  | 1 ± 0.08 | 1.19 ± 0.09 | 0.0222 |
| METTL6  | 1 ± 0.19 | 0.8 ± 0.06  | 0.1217 |
| METTL7A | 1 ± 0.05 | 1.24 ± 0.1  | 0.0099 |
| METTL7B | 1 ± 0.14 | 1 ± 0.03    | 0.9713 |
| RBM15   | 1 ± 0.17 | 1.2 ± 0.19  | 0.1655 |
| VIRMA   | 1 ± 0.22 | 1.16 ± 0.15 | 0.2702 |
| WTAP    | 1 ± 0.2  | 1.07 ± 0.1  | 0.5736 |
| YTHDC1  | 1 ± 0.16 | 1.72 ± 0.2  | 0.0016 |
| YTHDC2  | 1 ± 0.07 | 1.14 ± 0.13 | 0.1339 |
| YTHDF1  | 1 ± 0.15 | 1.47 ± 0.22 | 0.0156 |
| YTHDF2  | 1 ± 0.16 | 1.5 ± 0.22  | 0.012  |
| YTHDF3  | 1 ± 0.15 | 1.71 ± 0.16 | 0.0007 |
| Z3CH    | 1 ± 0.16 | 0.7 ± 0.09  | 0.0223 |

**Supplementary Table 2.** Gene expression levels (mean ± SD) for Sec RNA modification regulatory genes, including writers, readers, and erasers, in WT and R6/2 Striatum. Statistical significance between wild-type (WT) and R6/2 groups was assessed using an unpaired *t*-test (N = 4 per group). Reported *p*-values indicate differences in expression between WT and R6/2

| Gene     | WT       | Zq175       | pValue |
|----------|----------|-------------|--------|
| ALKBH1   | 1 ± 0.64 | 1.5 ± 0.38  | 0.2382 |
| ALKBH2   | 1 ± 0.58 | 0.91 ± 0.13 | 0.778  |
| ALKBH3   | 1 ± 0.62 | 1.08 ± 0.47 | 0.8507 |
| ALKBH4   | 1 ± 0.56 | 1.67 ± 0.62 | 0.1567 |
| ALKBH5   | 1 ± 0.72 | 2.13 ± 0.17 | 0.0485 |
| ALKBH6   | 1 ± 0.35 | 1.15 ± 0.25 | 0.5148 |
| ALKBH7   | 1 ± 0.57 | 1 ± 0.16    | 0.9903 |
| ALKBH8   | 1 ± 0.33 | 1.29 ± 0.22 | 0.2036 |
| EIF3A    | 1 ± 0.17 | 0.82 ± 0.14 | 0.1563 |
| FMRP     | 1 ± 0.12 | 0.8 ± 0.18  | 0.1316 |
| FTO      | 1 ± 0.09 | 0.8 ± 0.13  | 0.0576 |
| HNRNPA   | 1 ± 0.21 | 0.77 ± 0.13 | 0.1304 |
| HNRNPC   | 1 ± 0.28 | 0.76 ± 0.16 | 0.2002 |
| IGF2BP1  | 1 ± 0.41 | 0.66 ± 0.38 | 0.2706 |
| IGF2BP2  | 1 ± 0.16 | 0.68 ± 0.21 | 0.0584 |
| IGF2BP3  | 1 ± 0.36 | 2.45 ± 0.83 | 0.0308 |
| KIAA1429 | 1 ± 0.09 | 0.83 ± 0.18 | 0.1525 |
| METTL1   | 1 ± 0.19 | 0.97 ± 0.23 | 0.8267 |
| METTL14  | 1 ± 0.48 | 1.02 ± 0.94 | 0.9689 |
| METTL15  | 1 ± 0.08 | 1.16 ± 0.21 | 0.2246 |

|          |          |             |        |
|----------|----------|-------------|--------|
| METTL16  | 1 ± 0.53 | 1.82 ± 0.25 | 0.0468 |
| METTL17  | 1 ± 0.26 | 1.54 ± 1.18 | 0.4294 |
| METTL19  | 1 ± 0.07 | 0.92 ± 0.34 | 0.6794 |
| METTL2   | 1 ± 0.24 | 0.96 ± 0.27 | 0.8196 |
| METTL25  | 1 ± 0.34 | 0.83 ± 0.2  | 0.4184 |
| METTL25B | 1 ± 0.43 | 1.03 ± 0.14 | 0.9041 |
| METTL26  | 1 ± 0.14 | 2.42 ± 1.32 | 0.1194 |
| METTL27  | 1 ± 0.45 | 1.41 ± 0.6  | 0.3241 |
| METTL3   | 1 ± 0.39 | 2.42 ± 0.49 | 0.0043 |
| METTL4   | 1 ± 0.25 | 1.02 ± 0.32 | 0.9424 |
| METTL5   | 1 ± 0.13 | 0.83 ± 0.16 | 0.1554 |
| METTL6   | 1 ± 0.18 | 0.78 ± 0.21 | 0.1566 |
| METTL7A  | 1 ± 0.68 | 1.25 ± 0.63 | 0.6122 |
| METTL7B  | 1 ± 0.27 | 0.57 ± 0.35 | 0.1013 |
| METTL8   | 1 ± 0.06 | 1.02 ± 0.31 | 0.893  |
| VIRMA    | 1 ± 0.16 | 0.83 ± 0.1  | 0.1297 |
| WTAP     | 1 ± 0.06 | 0.82 ± 0.09 | 0.0163 |
| YTDHC2   | 1 ± 0.12 | 0.73 ± 0.1  | 0.0142 |
| YTHDC1   | 1 ± 0.04 | 1.35 ± 0.39 | 0.1709 |
| YTHDF1   | 1 ± 0.19 | 1.24 ± 0.25 | 0.183  |
| YTHDF2   | 1 ± 0.3  | 1.42 ± 0.4  | 0.1463 |
| YTHDF3   | 1 ± 0.22 | 0.89 ± 0.12 | 0.408  |
| Z3CH     | 1 ± 0.21 | 0.58 ± 0.21 | 0.0267 |

**Supplementary Table 3.** Gene expression levels (mean ± SD) for Sec RNA modification regulatory genes, including writers, readers, and erasers, in WT and Zq175 Cortex. Statistical significance between wild-type (WT) and Zq175 groups was assessed using an unpaired *t*-test (N = 4 per group). Reported *p*-values indicate differences in expression between WT and Zq175.

| Gene   | WT       | Zq175       | pValue |
|--------|----------|-------------|--------|
| ALKBH1 | 1 ± 0.43 | 1.14 ± 0.26 | 0.5957 |
| ALKBH2 | 1 ± 0.56 | 0.73 ± 0.21 | 0.4249 |
| ALKBH3 | 1 ± 0.45 | 1.08 ± 0.19 | 0.7734 |
| ALKBH4 | 1 ± 0.36 | 4.5 ± 1.97  | 0.0355 |
| ALKBH5 | 1 ± 0.53 | 0.76 ± 0.23 | 0.4429 |
| ALKBH6 | 1 ± 0.48 | 0.78 ± 0.32 | 0.4797 |
| ALKBH7 | 1 ± 0.46 | 1.3 ± 0.6   | 0.4597 |
| ALKBH8 | 1 ± 0.54 | 1.05 ± 0.31 | 0.8765 |
| EIF3A  | 1 ± 0.26 | 1.19 ± 0.12 | 0.2609 |
| FMRP   | 1 ± 0.15 | 1.02 ± 0.08 | 0.8169 |

|          |          |             |        |
|----------|----------|-------------|--------|
| FTO      | 1 ± 0.53 | 1.28 ± 0.84 | 0.5995 |
| HNRG     | 1 ± 0.56 | 2.17 ± 1.06 | 0.1135 |
| HNRNPA   | 1 ± 0.29 | 3.74 ± 1.14 | 0.0143 |
| HNRNPC   | 1 ± 0.39 | 0.9 ± 0.27  | 0.6949 |
| IGF2BP1  | 1 ± 0.37 | 1.09 ± 0.52 | 0.7793 |
| IGF2BP2  | 1 ± 0.25 | 0.54 ± 0.23 | 0.0366 |
| IGF2BP3  | 1 ± 0.31 | 4.5 ± 2.13  | 0.0448 |
| KIAA1429 | 1 ± 0.53 | 0.49 ± 0.21 | 0.1492 |
| METTL1   | 1 ± 0.4  | 2.56 ± 0.96 | 0.0398 |
| METTL14  | 1 ± 0.49 | 6.8 ± 3.47  | 0.0428 |
| METTL15  | 1 ± 0.51 | 1.78 ± 0.75 | 0.1429 |
| METTL16  | 1 ± 0.47 | 1.83 ± 0.79 | 0.1344 |
| METTL17  | 1 ± 0.26 | 3.87 ± 1.39 | 0.0239 |
| METTL19  | 1 ± 0.4  | 2.39 ± 0.77 | 0.0271 |
| METTL2   | 1 ± 0.42 | 1.23 ± 0.5  | 0.5042 |
| METTL25  | 1 ± 0.33 | 2.07 ± 0.91 | 0.0949 |
| METTL25B | 1 ± 0.43 | 1.38 ± 0.53 | 0.3051 |
| METTL26  | 1 ± 0.36 | 1.38 ± 0.51 | 0.2745 |
| METTL27  | 1 ± 0.61 | 0.96 ± 0.37 | 0.9245 |
| METTL3   | 1 ± 0.36 | 1.93 ± 0.53 | 0.0317 |
| METTL4   | 1 ± 0.54 | 1.71 ± 0.73 | 0.1767 |
| METTL5   | 1 ± 0.15 | 3.2 ± 1.38  | 0.0488 |
| METTL6   | 1 ± 0.43 | 1.42 ± 0.61 | 0.305  |
| METTL7A  | 1 ± 0.17 | 2.37 ± 1.12 | 0.0896 |
| METTL8   | 1 ± 0.43 | 1.84 ± 0.67 | 0.0905 |
| RBM15    | 1 ± 0.5  | 1.6 ± 0.48  | 0.132  |
| VIRMA    | 1 ± 0.45 | 2.7 ± 1.1   | 0.0465 |
| WTAP     | 1 ± 0.94 | 1.29 ± 1.05 | 0.6934 |
| YTDHC2   | 1 ± 0.54 | 2.42 ± 1.17 | 0.0884 |
| YTHDC1   | 1 ± 0.24 | 1.24 ± 0.36 | 0.3107 |
| YTHDF1   | 1 ± 0.56 | 1.13 ± 0.26 | 0.6955 |
| YTHDF2   | 1 ± 0.42 | 1.05 ± 0.38 | 0.8766 |
| YTHDF3   | 1 ± 0.17 | 1.39 ± 0.14 | 0.0132 |
| Z3CH     | 1 ± 0.72 | 2.47 ± 0.46 | 0.0184 |

**Supplementary Table 4.** Gene expression levels (mean ± SD) for Sec RNA modification regulatory genes, including writers, readers, and erasers, in WT and Zq175 Striatum. Statistical significance between wild-type (WT) and Zq175 groups was assessed using an unpaired *t*-test (N = 4 per group). Reported *p*-values indicate differences in expression between WT and Zq175.

| Gene     | Q7          | Q111        | pValue  |
|----------|-------------|-------------|---------|
| ALKBH1   | 1.42 ± 0.37 | 4.95 ± 0.43 | 0.0005  |
| ALKBH2   | 1.06 ± 0.08 | 1.12 ± 0.11 | 0.4968  |
| ALKBH3   | 1.14 ± 0.14 | 2.01 ± 0.06 | 0.0033  |
| ALKBH4   | 0.79 ± 0.21 | 2.98 ± 0.02 | 0.0026  |
| ALKBH5   | 1.19 ± 0.18 | 2.41 ± 0.81 | 0.1149  |
| ALKBH6   | 1.04 ± 0.05 | 2.87 ± 0.1  | 0.0002  |
| ALKBH7   | 1.18 ± 0.16 | 1.39 ± 0.09 | 0.1301  |
| ALKBH8   | 1.05 ± 0.09 | 2.23 ± 0.07 | <0.0001 |
| CBLL1    | 1.01 ± 0.1  | 0.9 ± 0.1   | 0.2541  |
| EIF2A    | 1.25 ± 0.32 | 2.12 ± 0.05 | 0.0387  |
| FMRP     | 0.89 ± 0.14 | 2.05 ± 0.13 | 0.0005  |
| FTO      | 0.74 ± 0.24 | 6.3 ± 1.1   | 0.0099  |
| HNRG     | 0.72 ± 0.24 | 1.34 ± 0.08 | 0.0366  |
| HNRNPA   | 0.67 ± 0.3  | 1.11 ± 0.18 | 0.1075  |
| HNRNPC   | 0.74 ± 0.23 | 1.1 ± 0.17  | 0.1037  |
| IGF2BP1  | 0.76 ± 0.23 | 2.89 ± 0.29 | 0.0007  |
| IGF2BP2  | 0.73 ± 0.24 | 1.91 ± 0.29 | 0.0061  |
| IGF2BP3  | 0.71 ± 0.26 | 1.4 ± 0.2   | 0.0247  |
| KIAA1429 | 0.79 ± 0.21 | 1.11 ± 0.17 | 0.111   |
| METTL1   | 1.22 ± 0.26 | 2.63 ± 0.2  | 0.0022  |
| METTL14  | 0.99 ± 0.01 | 1.48 ± 0.46 | 0.2108  |
| METTL15  | 1.04 ± 0.05 | 1.93 ± 0.04 | <0.0001 |
| METTL16  | 1.06 ± 0.07 | 2.63 ± 0.07 | <0.0001 |
| METTL17  | 1.03 ± 0.08 | 3.37 ± 0.28 | 0.0027  |
| METTL19  | 0.91 ± 0.12 | 3.32 ± 0.73 | 0.0271  |
| METTL2   | 1.12 ± 0.12 | 2.36 ± 0.23 | 0.0035  |
| METTL25  | 0.87 ± 0.2  | 0.86 ± 0.1  | 0.9557  |
| METTL25B | 1.37 ± 0.32 | 3.18 ± 0.4  | 0.004   |
| METTL26  | 1.4 ± 0.52  | 2.77 ± 0.35 | 0.0243  |
| METTL27  | 1.11 ± 0.1  | 2.04 ± 0.09 | 0.0003  |
| METTL3   | 1.05 ± 0.04 | 2.54 ± 0.14 | 0.0014  |
| METTL4   | 1.03 ± 0.04 | 2.53 ± 0.01 | <0.0001 |
| METTL5   | 1.1 ± 0.12  | 3.6 ± 0.27  | 0.001   |
| METTL6   | 1.1 ± 0.1   | 2.1 ± 0.01  | 0.003   |
| METTL7A  | 1.05 ± 0.06 | 10.7 ± 1    | 0.0035  |
| METTL7B  | 0.91 ± 0.57 | 4.04 ± 0.7  | 0.0045  |
| METTL8   | 1.02 ± 0.04 | 1.83 ± 0.03 | <0.0001 |
| RBM15    | 0.85 ± 0.13 | 1.46 ± 0.15 | 0.0058  |
| VIRMA    | 0.71 ± 0.25 | 1.32 ± 0.13 | 0.034   |
| WTAP     | 0.77 ± 0.23 | 1.43 ± 0.18 | 0.0205  |

|        |             |             |        |
|--------|-------------|-------------|--------|
| YTHDC1 | 0.73 ± 0.25 | 1.84 ± 0.14 | 0.0054 |
| YTHDC2 | 0.71 ± 0.26 | 1.16 ± 0.06 | 0.0857 |
| YTHDF1 | 0.97 ± 0.03 | 1.6 ± 0.05  | 0.0002 |
| YTHDF2 | 0.76 ± 0.21 | 1.36 ± 0.23 | 0.0284 |
| YTHDF3 | 0.76 ± 0.22 | 1.04 ± 0.7  | 0.0016 |

**Supplementary Table 5.** Gene expression levels (mean ± SD) for Sec RNA modification regulatory genes, including writers, readers, and erasers, in Q7 and Q111 cells grown at 33°C in serum free media for 24 hours. Statistical significance between Q7 and Q111 cells was assessed using an unpaired *t*-test (N = 3 per group). Reported *p*-values indicate differences in expression between Q7 and Q111 cells.

| Gene     | Q7 37C      | Q111 37C     | pValue 37 |
|----------|-------------|--------------|-----------|
| ALKBH1   | 1.87 ± 0.03 | 10.11 ± 5.47 | 0.121     |
| ALKBH2   | 1.04 ± 0    | 1.13 ± 0.2   | 0.5297    |
| ALKBH3   | 1.26 ± 0.01 | 2.86 ± 1.04  | 0.116     |
| ALKBH4   | 0.83 ± 0.05 | 5.41 ± 1.06  | 0.0173    |
| ALKBH5   | 1.72 ± 0.04 | 3.59 ± 0.47  | 0.0201    |
| ALKBH6   | 1.42 ± 0.16 | 4.11 ± 0.11  | <0.0001   |
| ALKBH7   | 2.21 ± 0.15 | 4.12 ± 1.89  | 0.2226    |
| ALKBH8   | 1.55 ± 0.1  | 3.07 ± 0.38  | 0.0155    |
| CBLL1    | 0.77 ± 0.03 | 1.01 ± 0.25  | 0.2375    |
| EIF2A    | 1.7 ± 0.01  | 2.71 ± 0.37  | 0.0411    |
| FMRP     | 0.73 ± 0.02 | 3.8 ± 1.12   | 0.0415    |
| FTO      | 0.97 ± 0.23 | 8.4 ± 1.68   | 0.0152    |
| HNRG     | 0.73 ± 0.15 | 1.52 ± 0.48  | 0.0923    |
| HNRNPA   | 0.83 ± 0.19 | 0.98 ± 0.27  | 0.2114    |
| HNRNPC   | 1.12 ± 0.05 | 1.8 ± 0.65   | 0.2114    |
| IGF2BP1  | 1.57 ± 0.21 | 3.25 ± 1.22  | 0.1367    |
| IGF2BP2  | 1.22 ± 0.44 | 2.72 ± 0.37  | 0.0115    |
| IGF2BP3  | 1.01 ± 0.2  | 2.31 ± 0.32  | 0.0066    |
| KIAA1429 | 1.08 ± 0.08 | 1.43 ± 0.45  | 0.313     |
| METTL1   | 1.09 ± 0.1  | 4.35 ± 1.11  | 0.0355    |
| METTL14  | 1.18 ± 0.25 | 1.67 ± 0.29  | 0.092     |
| METTL15  | 1.49 ± 0.29 | 3.56 ± 0.12  | 0.0024    |
| METTL16  | 1.99 ± 0.18 | 4.59 ± 0.24  | 0.0002    |
| METTL17  | 1.76 ± 0.22 | 9.14 ± 0.14  | <0.0001   |
| METTL19  | 1.21 ± 0.07 | 4.94 ± 0.64  | 0.0091    |
| METTL2   | 1.6 ± 0.08  | 3.88 ± 0.1   | <0.0001   |
| METTL25  | 0.62 ± 0.02 | 1.21 ± 0.09  | 0.0062    |
| METTL25B | 1.9 ± 0.17  | 5.94 ± 1.53  | 0.043     |

|         |             |              |         |
|---------|-------------|--------------|---------|
| METTL26 | 3.14 ± 0.08 | 2.63 ± 1.21  | 0.5479  |
| METTL27 | 1.67 ± 0.01 | 4.07 ± 1.7   | 0.1342  |
| METTL3  | 1.44 ± 0.01 | 4.64 ± 0.11  | 0.0003  |
| METTL4  | 1.93 ± 0.11 | 4.3 ± 0.21   | 0.0004  |
| METTL5  | 1.76 ± 0.12 | 4.58 ± 0.1   | <0.0001 |
| METTL6  | 1.53 ± 0.18 | 4.58 ± 0.58  | 0.0076  |
| METTL7A | 1.33 ± 0.49 | 13.91 ± 0.64 | <0.0001 |
| METTL7B | 0.28 ± 0.02 | 3.93 ± 0.72  | 0.0126  |
| METTL8  | 0.82 ± 0.06 | 2.07 ± 0.09  | 0.0001  |
| RBM15   | 0.88 ± 0.18 | 2.41 ± 0.56  | 0.0326  |
| VIRMA   | 1.19 ± 0.31 | 1.59 ± 0.36  | 0.2206  |
| WTAP    | 1.01 ± 0.22 | 1.57 ± 0.53  | 0.2003  |
| YTHDC1  | 1.14 ± 0.22 | 3.04 ± 0.23  | 0.0005  |
| YTHDC2  | 0.72 ± 0.23 | 1.29 ± 0.4   | 0.1143  |
| YTHDF1  | 1.09 ± 0.03 | 2.48 ± 0.2   | 0.0063  |
| YTHDF2  | 0.79 ± 0.09 | 1.17 ± 0.42  | 0.261   |
| YTHDF3  | 1.18 ± 0.23 | 2.09 ± 0.57  | 0.0915  |

**Supplementary Table 6.** Gene expression levels (mean ± SD) for Sec RNA modification regulatory genes, including writers, readers, and erasers, in Q7 and Q111 cells grown at 37°C in serum free media for 24 hours. Statistical significance between Q7 and Q111 cells was assessed using an unpaired *t*-test (N = 3 per group). Reported *p*-values indicate differences in expression between Q7 and Q111 cells.

| Gene     | Primer | Sequence 5'-3'          |
|----------|--------|-------------------------|
| METTL1   | FP     | AGCTGCATGAGTGGATGTG     |
|          | RP     | AGCTGCATGAGTGGATGTG     |
| METTL2   | FP     | CTTCTATGTGAGAGGTGATGGC  |
|          | RP     | AGCTGTTTCCCTCGATTCAC    |
| METTL3   | FP     | ATCCAGGCCATAAGAAACAG    |
|          | RP     | CTATCACTACGGAAGGTTGGG   |
| METTL4   | FP     | CTATATCCTTCGTGGTCTGTGG  |
|          | RP     | CTCTCCCCAGTACAAGACATTC  |
| METTL5   | FP     | GGATTTCGAAAAGCCCAAGTTAC |
|          | RP     | CTAAGTACTCCACAGCCACATC  |
| METTL6   | FP     | GAGTCTGTGGATGCCGTTAC    |
|          | RP     | GATCATTCAGCCCGTAGTCAC   |
| METTL8   | FP     | GAATACTAGAGGTTGGCTGTGG  |
|          | RP     | CTGTAGGACTTGTGGGACTTTAC |
| METTL14  | FP     | AGACGCCTTCATCTCTTTGAG   |
|          | RP     | CTCTGTACATCCGGTCAAGTATG |
| METTL15  | FP     | TGAAGAGAAAAGAGTTGGAAGCC |
|          | RP     | AGAATGGCTCTTGTATGTCCTC  |
| METTL16  | FP     | CTAATCCCACAGTCCCCTTG    |
|          | RP     | GGTTGCTCCAAGTAAGGATAG   |
| METTL19  | FP     | CAGAGCAGGAAGACACAGTAC   |
|          | RP     | GGCGGGTATGTTCTGGATTC    |
| METTL25B | FP     | CCCGACTAACAGCTCCTTTTC   |
|          | RP     | AGCCCACATCCACAACCTTG    |
| KIAA1429 | FP     | TTCCATCTTGAAGGTTCCGG    |
|          | RP     | CCACAATTTTCGGGTGTTGAG   |

|           |    |                         |
|-----------|----|-------------------------|
| RBM15     | FP | TTCATGCCTTCCCACCTTG     |
|           | RP | ATCTTCATCCGCTGTTCCACC   |
| ZC3H13    | FP | CAAGAGATGGGAAGGACAGAG   |
|           | RP | CTGAATAGATGACCCTGACTGTG |
| FTO       | FP | TCACAGCCTCGGTTTAGTTC    |
|           | RP | GCAGGATCAAAGGATTTCAACG  |
| WTAP      | FP | TTGGAGGGAAAGTACACAGATC  |
|           | RP | TCCTGCTCTTTGGTTGCTAG    |
| YTHDF1    | FP | CCCCAGAGAACAAGGACAAG    |
|           | RP | GACAGGTAAGGATCACTCATCG  |
| YTHDF2    | FP | ACTATGAGAAACGCCAAGAGG   |
|           | RP | TTAGGATAAGGAGATGCAACCG  |
| YTHDF3    | FP | TGCACATTATGAAAAGCGTCAAG |
|           | RP | GGCATTTCAGAGTCTACATCA   |
| IGF2BP1   | FP | GAGCAGGAGATGGTACAAGTG   |
|           | RP | TTGGAGTCAGGTGTTTCTGG    |
| IGF2BP2   | FP | CAATCCATGCTACCCCAGAAG   |
|           | RP | TGCCAATCAGTCTTCCAACG    |
| IGF2BP3   | FP | ATCTGTTTATTCCCGCCCTG    |
|           | RP | TCACCATCCGCACTTTAGC     |
| HNRNPC    | FP | GCTTGCCTTTGTCCAGTATG    |
|           | RP | CGTTTCACACCTGCTTTTCC    |
| HNRNPA2B1 | FP | CAAAGTTCTAGGAGTGGAAGAGG |
|           | RP | CCCATTATAGCCATCCCCAAA   |
| YTHDC1    | FP | TTTTCAGGAGTTCGCCGAG     |
|           | RP | GTAAGGATGGTGTGGAGGTTG   |
| YTHDC2    | FP | TTACTGTCCTGGTGTCTGTG    |
|           | RP | CTGTCTTCCATCTCACTGTCAC  |

|         |    |                         |
|---------|----|-------------------------|
| VIRMA   | FP | ACCTCATAACAATGACCCAACC  |
|         | RP | ATCGACAGAAGCAAGGTGAC    |
| CBLL1   | FP | CTGACTTCCGTTCCCACTG     |
|         | RP | CTTTGCTGGCTTGTTTGGAG    |
| HNRNPG  | FP | TCAAGCAGAGATTACCCAAGC   |
|         | RP | ATCACGGGAAGTGAATGAC     |
| EIF3A   | FP | TGGGAATCATAACAGGCAGTG   |
|         | RP | AGTTGTCACATAGCTTGCGG    |
| FMRP    | FP | AGAGGGTGTTAGTGGTTTCATC  |
|         | RP | AGAACAGTGGCATTAGCGATG   |
| ALKBH1  | FP | TTCATTCAAACCCCTTCCTC    |
|         | RP | TTAGTCATGTGCTTGCCAGG    |
| ALKBH2  | FP | TCTTACCCTGACACCAAAGC    |
|         | RP | GCTCGTCATCTCTGTGCTC     |
| ALKBH3  | FP | ACGGGACCTTGCTAATCATG    |
|         | RP | CTCTTGGGTCTGGATAAACGG   |
| ALKBH4  | FP | CTCCAAGTTGCTTTAGTTCCAAG |
|         | RP | TAACTTTAGGGCCATAGTCCTG  |
| ALKBH5  | FP | AGTTCCAGTTCAAGCCCATC    |
|         | RP | GGCGTTCCTTAATGTCCTGAG   |
| ALKBH6  | FP | GAAGACGCTGTAGACGGAC     |
|         | RP | CTTGGAGATGAAGTCAGGGAC   |
| ALKBH7  | FP | CAAGTGTTATGAAGCTGGTGC   |
|         | RP | CATGGGAGAAGTCATATCGGG   |
| ALKBH8  | FP | GCCCATATTGACACGCATTC    |
|         | RP | ATCACCAGCAAACCTCCGAC    |
| METTL7A | FP | GTGACCGATGGCTCTGTG      |
|         | RP | GTAGACCGTTCATCTGCCAC    |

|         |    |                        |
|---------|----|------------------------|
| METTL7B | FP | CCCTGGTGCTATGTTCTGTG   |
|         | RP | AGGCTCTAAAACGCTGC      |
| METTL17 | FP | CAGGAACTCAGCTACAGTGAAG |
|         | RP | ACCCAAAGTCCATCAACGTC   |
| METTL25 | FP | GATGTGCTAACGAAAACGTTGG |
|         | RP | AAGAGTGATTGAGTAGGCAGC  |
| METTL26 | FP | GACACCTGCTCAAAACCAAG   |
|         | RP | CAGAAGGACTGTGTACGAAG   |
| METTL27 | FP | CTGATCCTCTGTGTATGGTCTC |
|         | RP | GGAGTCTTTTCAGTCCCTTTGG |

**Supplementary Table 7.** Primer sequence of m<sup>6</sup>A regulatory genes used in the study. FP: Forward Primer, RP: Reverse Primer

| Target           | Vendor                    | Dilution | Catalog |
|------------------|---------------------------|----------|---------|
| METTL3           | Proteintech               | 1:1000   |         |
| YTHDC1           | Cell Signaling Technology | 1:2000   |         |
| YTHDC2           | Cell Signaling Technology | 1:2000   |         |
| IGF2BP2          | Proteintech               | 1:5000   |         |
| IGF2BP3          | Proteintech               | 1:5000   |         |
| METTL14          | Proteintech               | 1:1000   |         |
| Caspase 3        | Proteintech               | 1:1000   |         |
| Caspase 9        | Proteintech               | 1:1000   |         |
| m <sup>6</sup> A | Proteintech               | 1:1000   |         |
| β-Actin          | Proteintech               | 1:5000   |         |
| IC2              | Abcam                     | 1:5000   |         |

**Supplementary Table 8.** Antibody information used in the study. This table lists all primary antibodies used in the study, their dilution, catalog numbers and vendors.

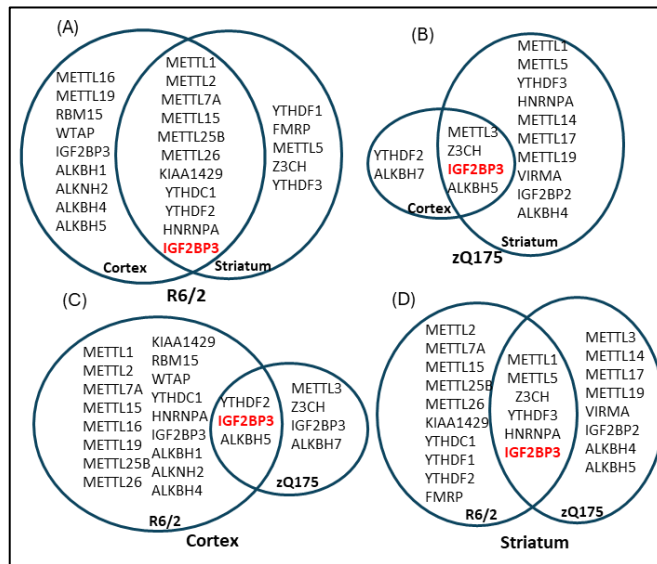

**Supplementary Figure 1. Venn analysis of differentially expressed genes in the cortex and striatum of Huntington's disease mouse models.** (A) Venn diagram showing overlap of differentially expressed genes between the cortex and striatum in the R6/2 mouse model. (B) Venn diagram showing overlap of differentially expressed genes between the cortex and striatum in the zQ175 mouse model. (C) Venn diagram comparing differentially expressed genes in the cortex between R6/2 and zQ175 mouse models. (D) Venn diagram comparing differentially expressed genes in the striatum between R6/2 and zQ175 mouse models. Differential expression was defined as  $p < 0.05$ .
